# Supplementary material for: COPD Surveillance—United States, 1999-2011
Source: PubMed Central journal article supplement — Chest. 2013 Apr 25;144(1):284–305. doi: 10.1378/chest.13-0809 (PMC3707177; doi:10.1378/chest.13-0809), 2013-04-25
Supplement: chest_144_1_284_ds01.pdf [file chest_144_1_284_ds01.pdf]

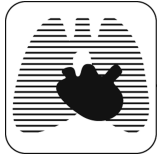

## COPD Surveillance—United States, 1999-2011

*Earl S. Ford, MD, MPH; Janet B. Croft, PhD; David M. Mannino, MD, FCCP;  
Anne G. Wheaton, PhD; Xingyou Zhang, PhD; and Wayne H. Giles, MD*

**e-Table 1.** Annual number of participants aged  $\geq 18$  years and response rate—National Health Interview Survey, 1999-2011

|                   | 1999   | 2000   | 2001   | 2002   | 2003   | 2004   | 2005   | 2006   | 2007   | 2008   | 2009   | 2010   | 2011   |
|-------------------|--------|--------|--------|--------|--------|--------|--------|--------|--------|--------|--------|--------|--------|
| Number            | 30,801 | 32,374 | 33,326 | 31,044 | 30,852 | 31,326 | 31,428 | 24,275 | 23,393 | 21,781 | 27,731 | 27,157 | 33,014 |
| Response rate (%) | 69.6   | 72.1   | 73.8   | 74.3   | 74.2   | 72.5   | 69.0   | 70.8   | 67.8   | 62.6   | 65.4   | 77.3   | 81.6   |

*Online supplements are not copyedited prior to posting.*

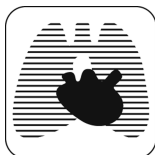

**e-Table 2.** Annual number of recorded physicians' office visits, physician response rate, and percent of records missing race—  
National Ambulatory Medical Care Survey, 1999-2010

|                                                | 1999   | 2000   | 2001   | 2002   | 2003   | 2004   | 2005   | 2006   | 2007   | 2008   | 2009   | 2010   |
|------------------------------------------------|--------|--------|--------|--------|--------|--------|--------|--------|--------|--------|--------|--------|
| No. of office visits                           | 20,760 | 27,369 | 24,281 | 28,738 | 25,288 | 25,286 | 25,665 | 29,392 | 32,778 | 28,741 | 32,281 | 31,229 |
| Physician response rate (%)                    | 62.9   | 67.7   | 64.4   | 70.4   | 66.9   | 64.7   | 61.5   | 58.9   | 61.6   | 59.1   | 62.1   | 58.3   |
| Unweighted percent of records missing race (%) | 16.9   | 18.3   | 20.7   | 17.0   | 16.9   | 19.2   | 20.6   | 26.9   | 31.0   | 32.8   | 23.8   | 23.0   |

*Online supplements are not copyedited prior to posting.*

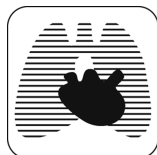**e-Table 3.** Annual US civilian population denominator data for adults aged  $\geq 25$  years, National Ambulatory Care Medical Survey and National Hospital Ambulatory Medical Care Survey, 1999-2010

| Variable               | Year        |             |             |             |             |             |             |             |             |             |             |             |
|------------------------|-------------|-------------|-------------|-------------|-------------|-------------|-------------|-------------|-------------|-------------|-------------|-------------|
|                        | 1999        | 2000        | 2001        | 2002        | 2003        | 2004        | 2005        | 2006        | 2007        | 2008        | 2009        | 2010        |
| <b>Race</b>            |             |             |             |             |             |             |             |             |             |             |             |             |
| White                  | 145,937,055 | 147,029,285 | 150,236,491 | 151,723,708 | 152,784,097 | 154,280,058 | 155,963,077 | 157,664,435 | 158,984,372 | 160,461,305 | 161,466,664 | 162,383,549 |
| Black                  | 19,752,339  | 20,077,706  | 19,877,233  | 20,199,901  | 20,482,191  | 20,821,307  | 21,215,662  | 21,580,388  | 21,886,562  | 22,231,696  | 22,589,216  | 22,988,604  |
| <b>Sex</b>             |             |             |             |             |             |             |             |             |             |             |             |             |
| Women                  | 91,017,562  | 91,837,043  | 94,697,872  | 95,784,903  | 96,546,863  | 97,606,874  | 98,788,072  | 100,064,960 | 101,014,292 | 102,013,051 | 102,816,776 | 103,580,601 |
| Men                    | 82,592,721  | 83,439,414  | 86,024,980  | 87,206,610  | 88,172,240  | 89,373,599  | 90,693,337  | 91,981,809  | 92,955,316  | 94,050,252  | 94,893,160  | 95,810,864  |
| <b>Age group (yrs)</b> |             |             |             |             |             |             |             |             |             |             |             |             |
| 25-44                  | 82,507,114  | 82,005,830  | 82,956,647  | 82,838,063  | 82,231,226  | 82,125,541  | 81,990,513  | 82,075,717  | 81,671,585  | 81,313,682  | 80,935,816  | 80,585,521  |
| 45-54                  | 35,596,129  | 36,936,143  | 38,896,629  | 39,749,785  | 40,469,595  | 41,282,730  | 42,145,882  | 42,927,829  | 43,513,714  | 44,005,261  | 44,215,494  | 44,058,729  |
| 55-64                  | 23,045,385  | 23,632,008  | 25,156,625  | 26,441,974  | 27,739,651  | 28,918,714  | 30,195,444  | 31,423,419  | 32,539,431  | 33,512,830  | 34,619,626  | 35,836,894  |
| 65-74                  | 17,794,425  | 17,751,989  | 18,078,685  | 18,030,421  | 18,093,185  | 18,219,543  | 18,395,955  | 18,672,985  | 19,107,744  | 19,878,994  | 20,548,853  | 21,190,077  |
| $\geq 75$              | 14,667,230  | 14,950,487  | 15,634,266  | 15,931,170  | 16,185,446  | 16,433,945  | 16,753,615  | 16,946,819  | 17,137,134  | 17,352,536  | 17,390,147  | 17,720,244  |
| <b>Total</b>           | 173,610,283 | 175,276,457 | 180,722,852 | 182,991,413 | 184,719,103 | 186,980,473 | 189,481,409 | 192,046,769 | 193,969,608 | 196,063,303 | 197,709,936 | 199,391,465 |

*Online supplements are not copyedited prior to posting.*



**e-Table 4.** Annual number of emergency department records and percent of emergency department records missing race—National Hospital Ambulatory Medical Care Survey, 1999-2010

|                                                                     | 1999   | 2000   | 2001   | 2002   | 2003   | 2004   | 2005   | 2006   | 2007   | 2008   | 2009   | 2010   |
|---------------------------------------------------------------------|--------|--------|--------|--------|--------|--------|--------|--------|--------|--------|--------|--------|
| No. of emergency department records                                 | 21,103 | 25,622 | 34,546 | 37,337 | 40,253 | 36,589 | 33,605 | 35,849 | 35,490 | 34,134 | 34,942 | 34,936 |
| Unweighted percent of emergency department records missing race (%) | 12.2   | 13.1   | 12.6   | 12.8   | 12.8   | 10.6   | 12.2   | 12.2   | 13.1   | 15.3   | 10.4   | 10.6   |

*Online supplements are not copyedited prior to posting.*



**e-Table 5.** Annual number of recorded hospital discharges, hospital response, and percent of collected hospital records missing race information—National Hospital Discharge Survey, 1999-2010

|                                                         | 1999    | 2000    | 2001    | 2002    | 2003    | 2004    | 2005    | 2006    | 2007    | 2008    | 2009    | 2010    |
|---------------------------------------------------------|---------|---------|---------|---------|---------|---------|---------|---------|---------|---------|---------|---------|
| No. of discharges                                       | 300,460 | 313,259 | 330,210 | 327,254 | 319,530 | 370,785 | 375,372 | 376,328 | 365,648 | 165,630 | 162,151 | 151,551 |
| Hospital response                                       | 458/487 | 434/481 | 448/477 | 445/474 | 426/479 | 439/476 | 444/473 | 438/478 | 422/477 | 207/238 | 205/238 | 203/236 |
| Unweighted percent of hospital records missing race (%) | 23.2    | 28.8    | 27.9    | 29.0    | 30.0    | 27.0    | 28.0    | 28.0    | 30.0    | 31.0    | 19.0    | 16.0    |

*Online supplements are not copyedited prior to posting.*

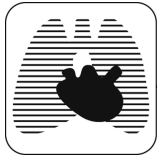**e-Table 6.** Annual US civilian population denominator data (in thousands)—National Hospital Discharge Survey, 1999-2010

| Variable               | 1999    | 2000    | 2001    | 2002    | 2003    | 2004    | 2005    | 2006    | 2007    | 2008    | 2009    | 2010    |
|------------------------|---------|---------|---------|---------|---------|---------|---------|---------|---------|---------|---------|---------|
| <b>Race</b>            |         |         |         |         |         |         |         |         |         |         |         |         |
| White                  | 148,396 | 149,481 | 152,398 | 154,190 | 155,249 | 156,747 | 158,429 | 160,132 | 161,514 | 163,000 | 164,002 | 164,908 |
| Black                  | 20,453  | 20,760  | 20,751  | 21,083  | 21,364  | 21,703  | 22,099  | 22,465  | 22,805  | 23,162  | 23,536  | 23,932  |
| <b>Sex</b>             |         |         |         |         |         |         |         |         |         |         |         |         |
| Women                  | 92,558  | 93,371  | 95,937  | 97,235  | 97,999  | 99,058  | 100,239 | 101,518 | 102,470 | 103,468 | 104,271 | 105,032 |
| Men                    | 84,269  | 85,210  | 87,795  | 89,182  | 90,149  | 91,350  | 92,671  | 93,957  | 95,025  | 96,146  | 97,001  | 97,911  |
| <b>Age group (yrs)</b> |         |         |         |         |         |         |         |         |         |         |         |         |
| 25-44                  | 83,576  | 83,161  | 83,980  | 84,171  | 83,566  | 83,459  | 83,325  | 83,410  | 83,086  | 82,754  | 82,390  | 82,035  |
| 45-54                  | 35,813  | 37,162  | 39,152  | 40,044  | 40,765  | 41,578  | 42,441  | 43,223  | 43,816  | 44,313  | 44,531  | 44,372  |
| 55-64                  | 23,198  | 23,783  | 25,307  | 26,600  | 27,897  | 29,077  | 30,354  | 31,582  | 32,706  | 33,681  | 34,781  | 35,998  |
| 65-74                  | 18,043  | 17,993  | 18,314  | 18,274  | 18,337  | 18,463  | 18,639  | 18,917  | 19,352  | 20,123  | 20,792  | 21,433  |
| ≥75                    | 16,196  | 16,484  | 16,978  | 17,328  | 17,583  | 17,831  | 18,151  | 18,344  | 18,536  | 18,747  | 18,778  | 19,106  |
| <b>Total</b>           | 176,826 | 178,583 | 183,731 | 186,417 | 188,148 | 190,408 | 192,910 | 195,476 | 197,496 | 199,618 | 201,272 | 202,944 |

*Online supplements are not copyedited prior to posting.*
